# Supplementary material for: Synthesis and structural study of a new group of trigermanates, CaRE2Ge3O10(RE = La–Yb)
Source: Royal Society of Chemistry journal article supplement (doi:10.1039/c5ce00063g), 2015-01-01
Supplement: c5ce00063g1.pdf [file c5ce00063g1.pdf]

## Electronic Supplementary Information (ESI)

### Synthesis and structural study of a new group of trigermanates, $\text{CaRE}_2\text{Ge}_3\text{O}_{10}$ ( $RE = \text{La}–\text{Yb}$ )

**Olga A. Lipina,<sup>a</sup> Ludmila L. Surat,<sup>a</sup> Alexander P. Tyutyunnik,<sup>a</sup> Ivan I. Leonidov,<sup>\*a,b</sup>  
Emma G. Vovkotrub<sup>c</sup> and Vladimir G. Zubkov<sup>a</sup>**

<sup>a</sup> Institute of Solid State Chemistry, UB RAS, 620990 Ekaterinburg, Russia

<sup>b</sup> Ural Federal University, 620002 Ekaterinburg, Russia

<sup>c</sup> Institute of High-Temperature Electrochemistry, UB RAS, 620990 Ekaterinburg, Russia

Corresponding author: [ivanleonidov@ihim.uran.ru](mailto:ivanleonidov@ihim.uran.ru)

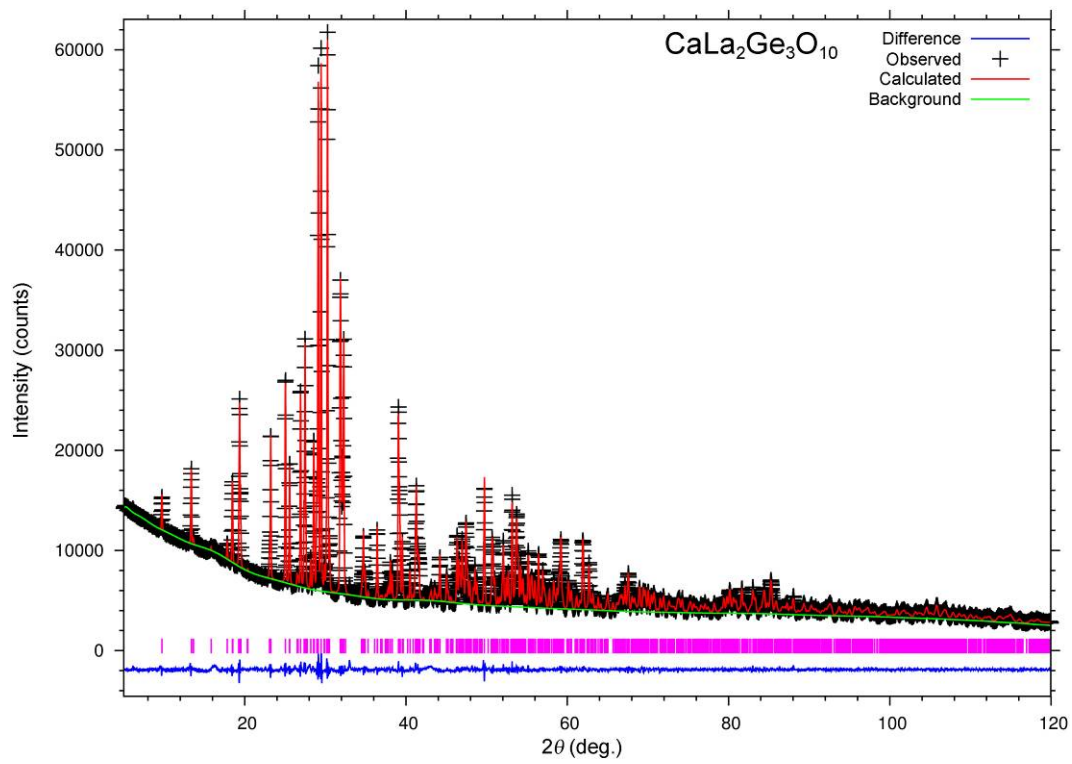

Fig. S1 Rietveld refinement of CaLa<sub>2</sub>Ge<sub>3</sub>O<sub>10</sub> from the powder XRD data.

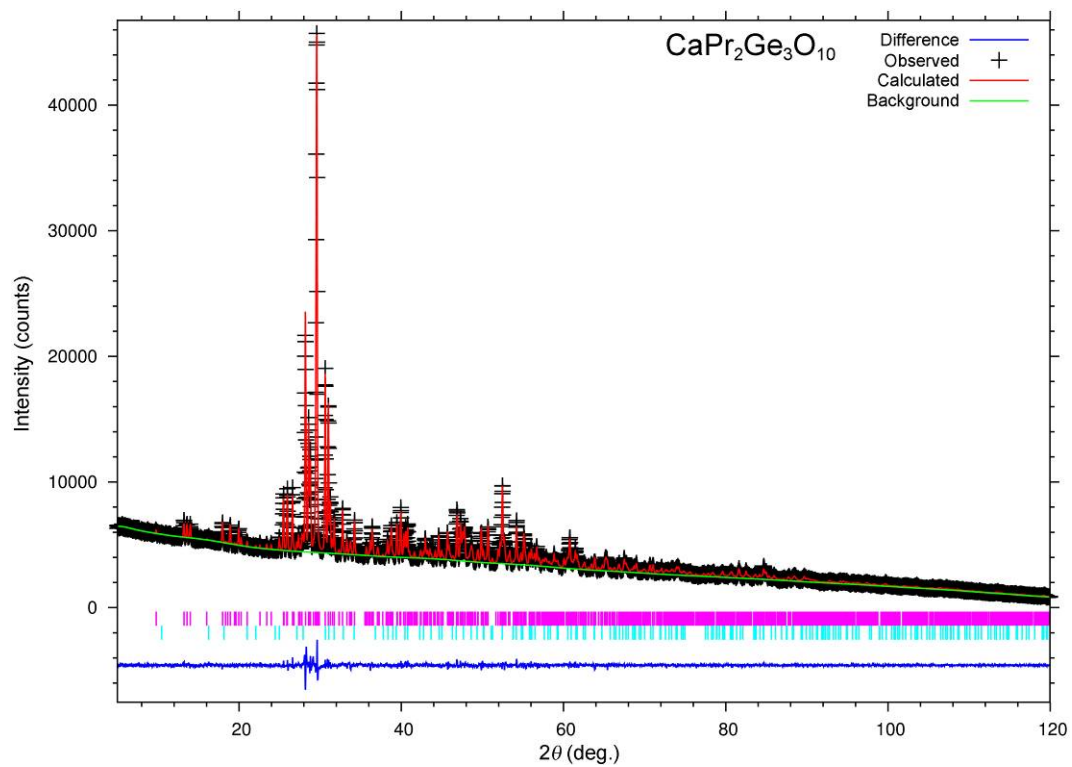

Fig. S2 Rietveld refinement of CaPr<sub>2</sub>Ge<sub>3</sub>O<sub>10</sub> from the powder XRD data.

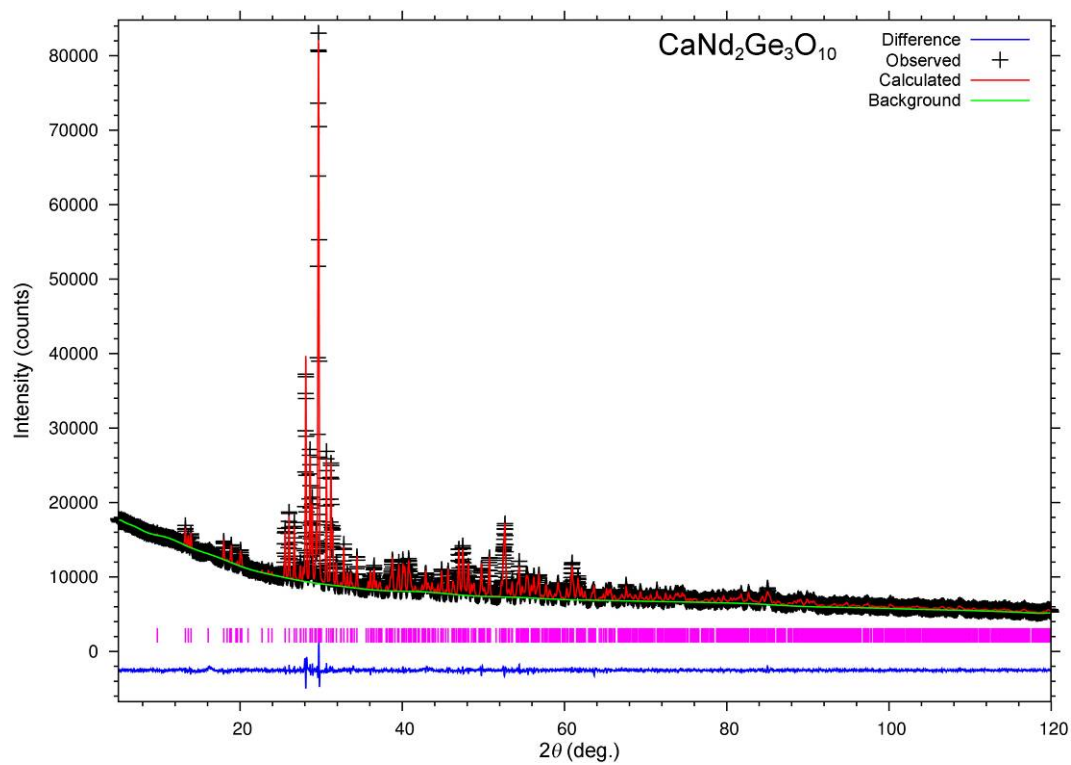

Fig. S3 Rietveld refinement of  $\text{CaNd}_2\text{Ge}_3\text{O}_{10}$  from the powder XRD data.

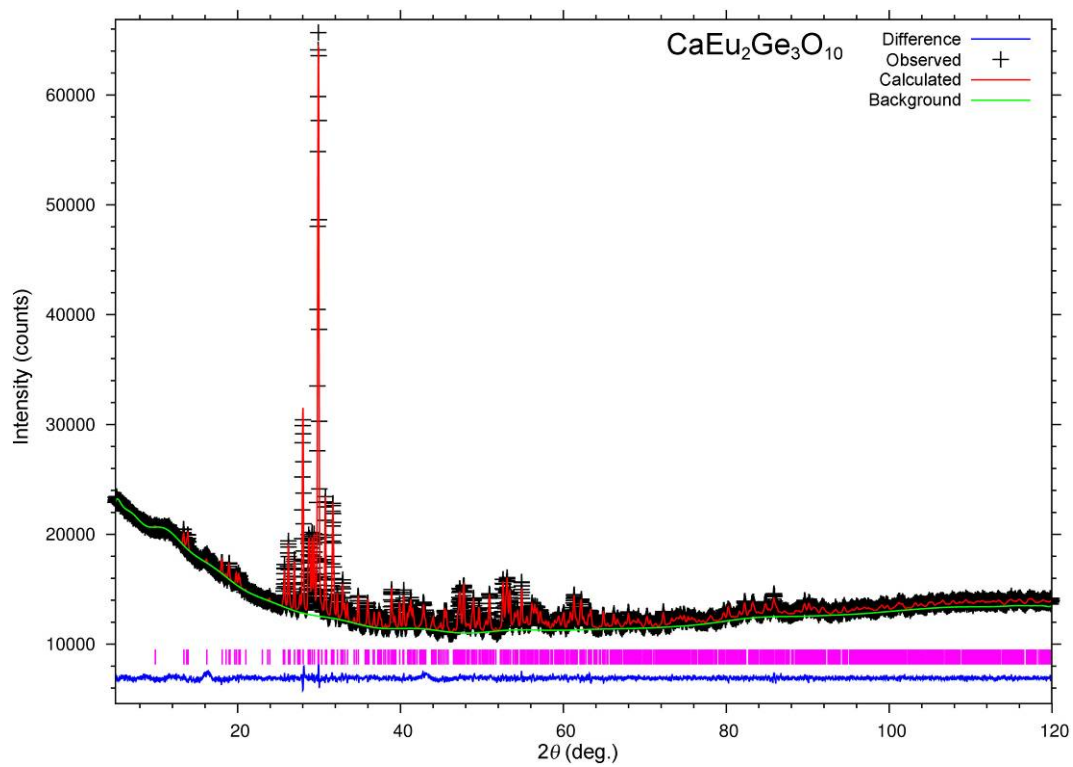

Fig. S4 Rietveld refinement of  $\text{CaEu}_2\text{Ge}_3\text{O}_{10}$  from the powder XRD data.

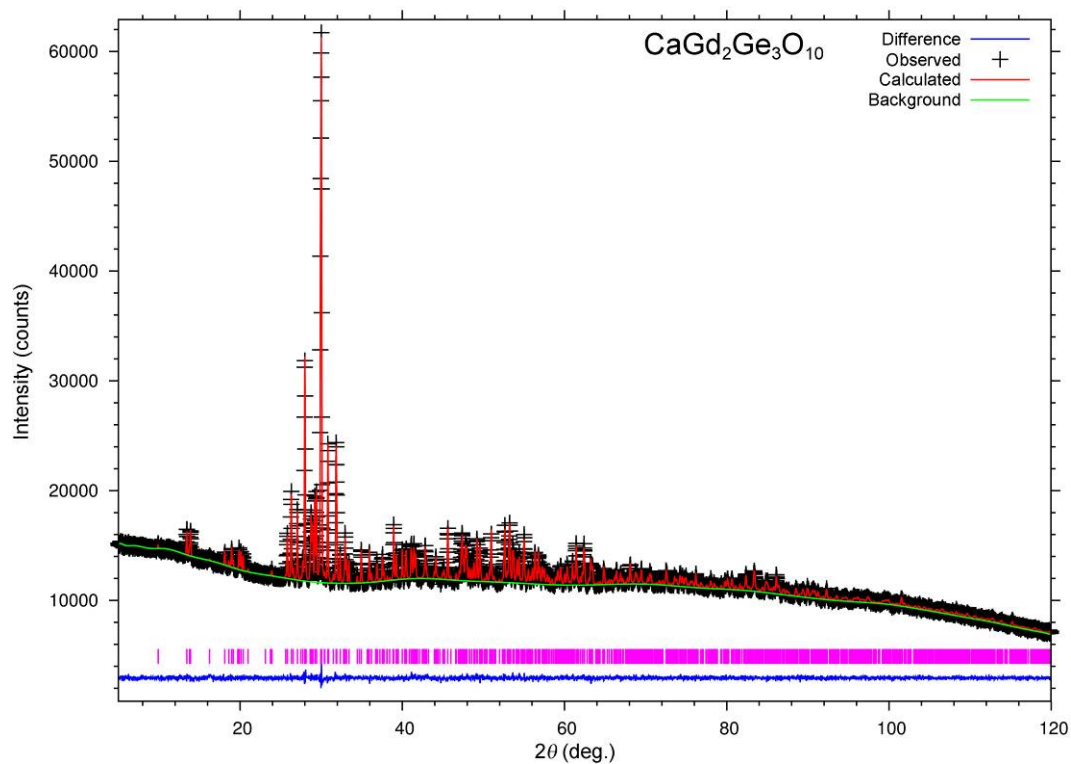

Fig. S5 Rietveld refinement of  $\text{CaGd}_2\text{Ge}_3\text{O}_{10}$  from the powder XRD data.

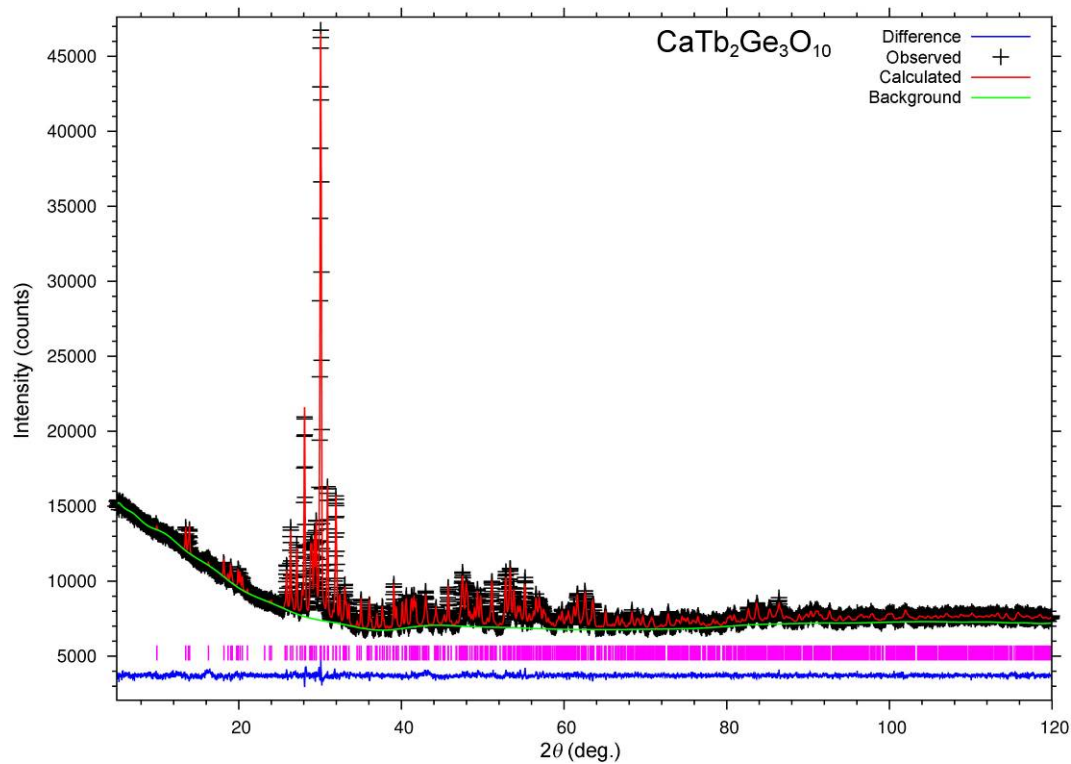

Fig. S6 Rietveld refinement of  $\text{CaTb}_2\text{Ge}_3\text{O}_{10}$  from the powder XRD data.

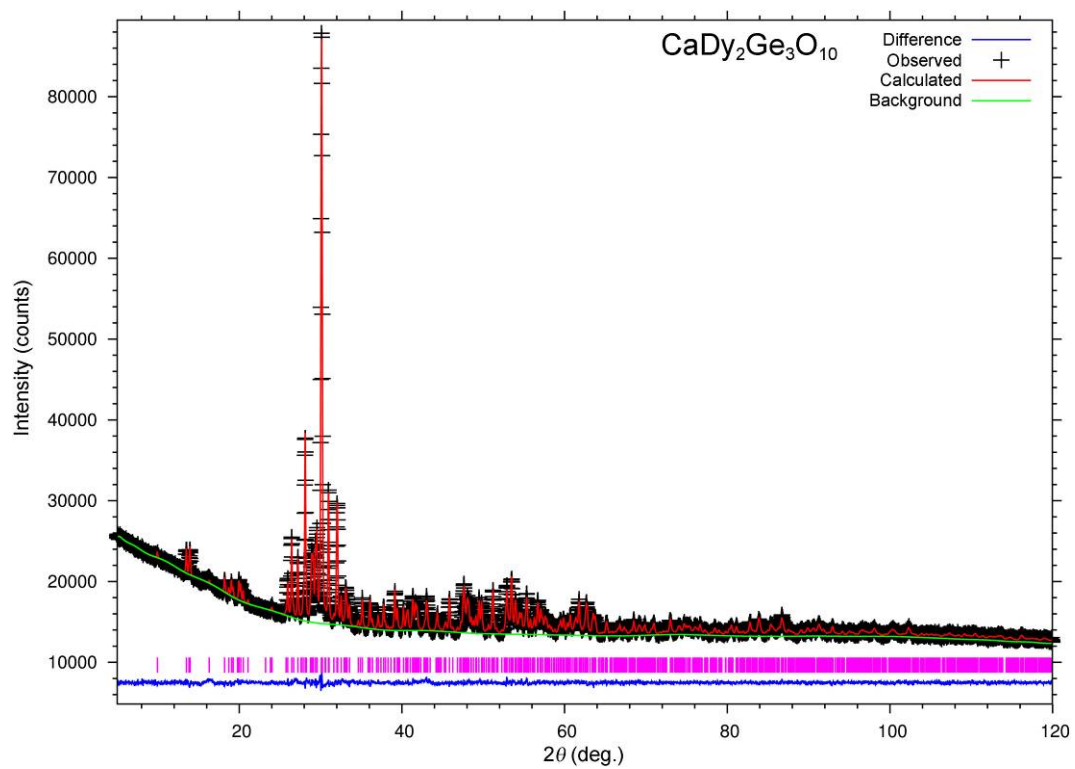

Fig. S7 Rietveld refinement of CaDy<sub>2</sub>Ge<sub>3</sub>O<sub>10</sub> from the powder XRD data.

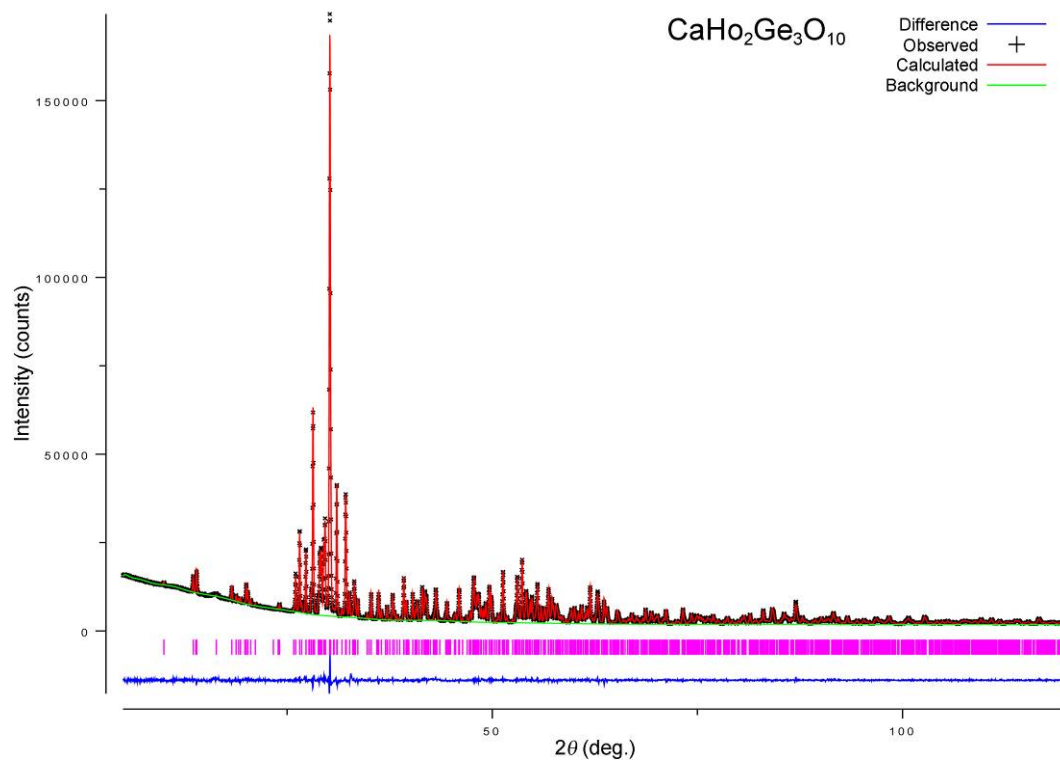

Fig. S8 Rietveld refinement of CaHo<sub>2</sub>Ge<sub>3</sub>O<sub>10</sub> from the powder XRD data.

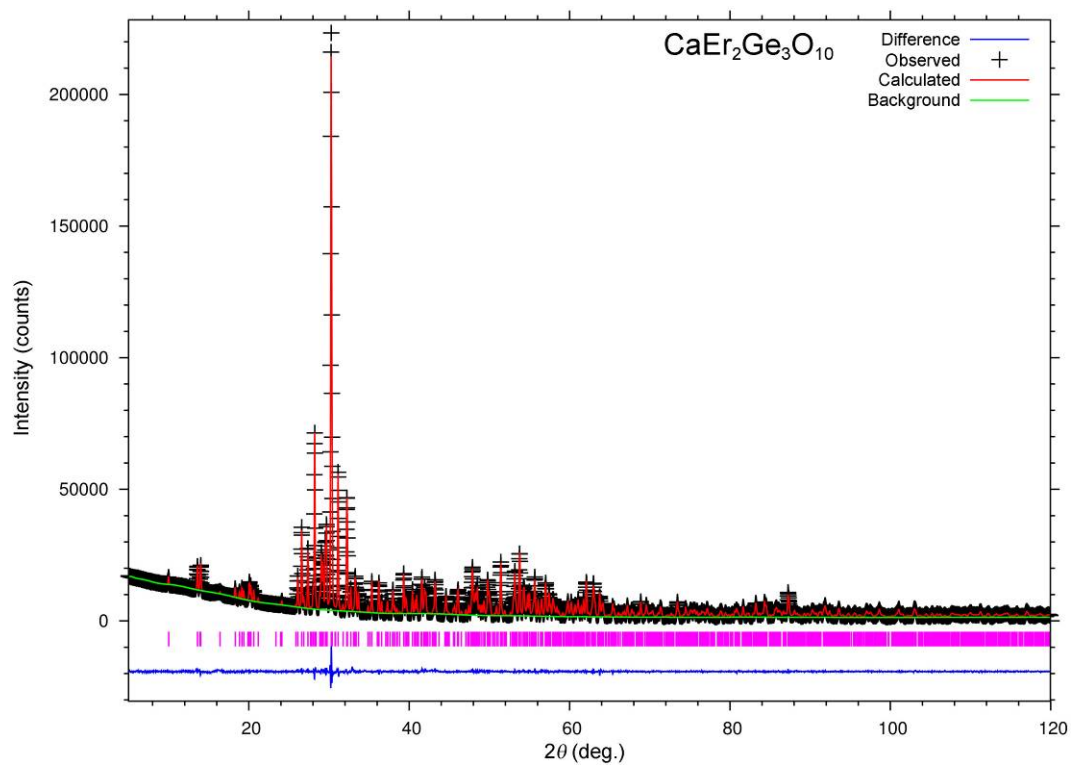

Fig. S9 Rietveld refinement of  $\text{CaEr}_2\text{Ge}_3\text{O}_{10}$  from the powder XRD data.

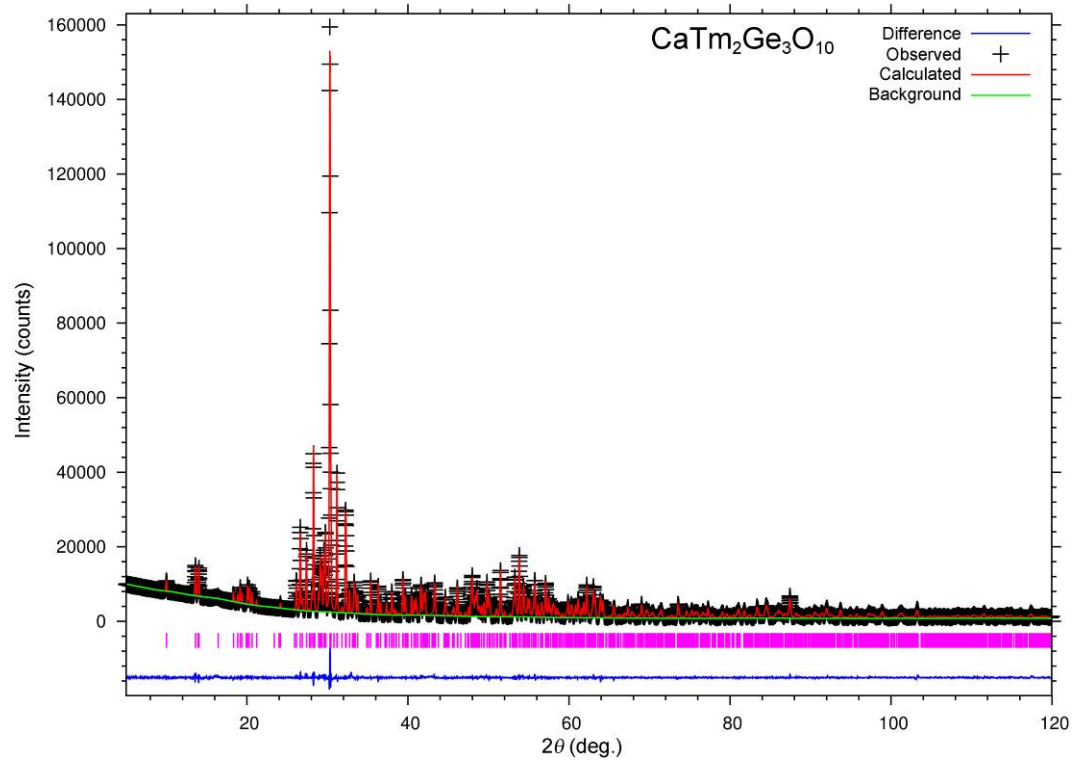

Fig. S10 Rietveld refinement of  $\text{CaTm}_2\text{Ge}_3\text{O}_{10}$  from the powder XRD data.

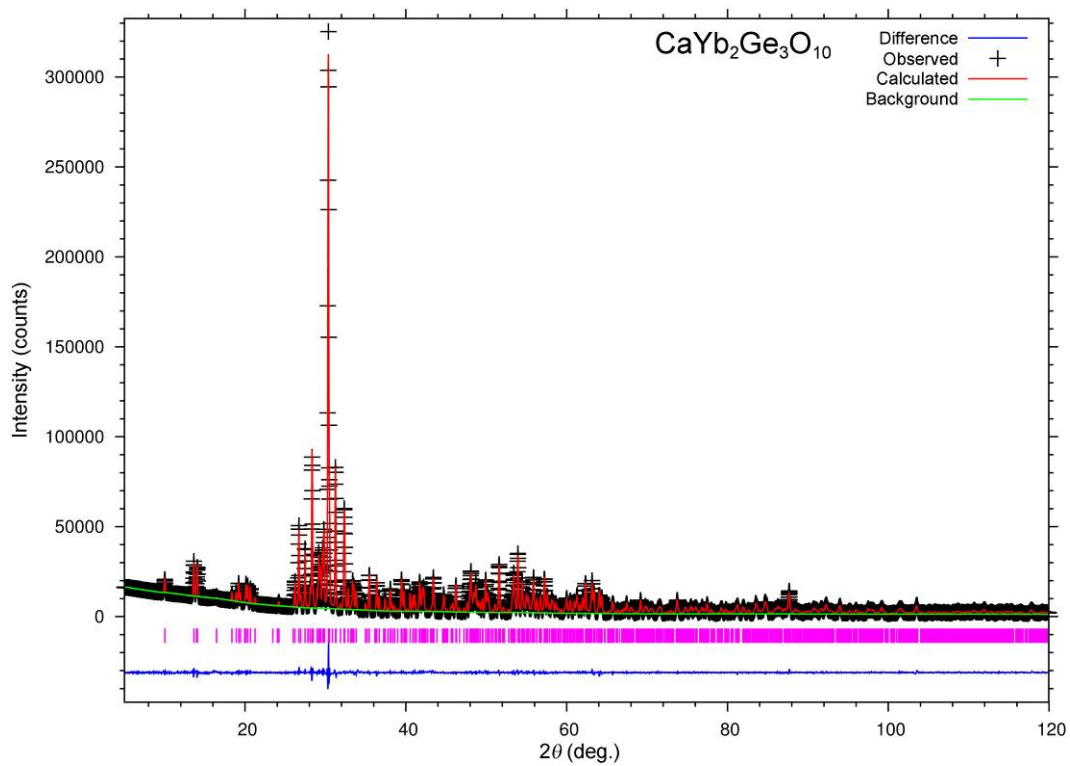

Fig. S11 Rietveld refinement of CaYb<sub>2</sub>Ge<sub>3</sub>O<sub>10</sub> from the powder XRD data.

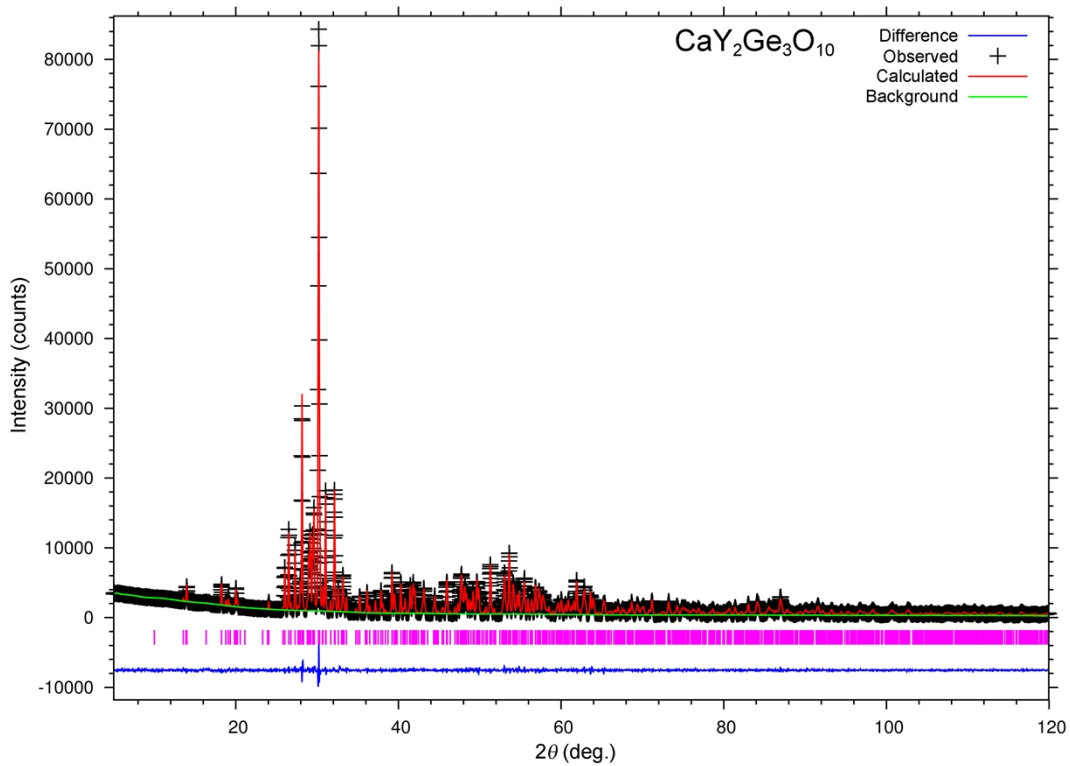

Fig. S12 Rietveld refinement of CaY<sub>2</sub>Ge<sub>3</sub>O<sub>10</sub> from the powder XRD data.

**Table S1** Atomic coordinates and thermal parameters ( $\text{\AA}^2$ ) for  $\text{CaRE}_2\text{Ge}_3\text{O}_{10}$  ( $RE = \text{La-Tb}$ )

| Atom        |                  | La         | Pr        | Nd        | Eu        | Gd        | Tb        |
|-------------|------------------|------------|-----------|-----------|-----------|-----------|-----------|
| Ca(1)/RE(1) | <i>x/a</i>       | 0.9296(6)  | 0.0397(5) | 0.0358(4) | 0.0305(6) | 0.0306(5) | 0.0280(6) |
|             | <i>y/b</i>       | 0.0516(5)  | 0.8987(4) | 0.8992(4) | 0.9014(5) | 0.9042(4) | 0.9012(5) |
|             | <i>z/c</i>       | 0.5771(2)  | 0.4110(2) | 0.4115(2) | 0.4141(2) | 0.4156(2) | 0.4151(2) |
|             | $U_i/U_e^*100$   | 3.9(2)     | 3.0(3)    | 2.5(1)    | 2.6(1)    | 2.9(1)    | 3.2(1)    |
| Ca(2)/RE(2) | <i>x/a</i>       | 0.6384(2)  | 0.5814(5) | 0.5838(5) | 0.5823(6) | 0.5814(5) | 0.5790(6) |
|             | <i>y/b</i>       | 0.1758(2)  | 0.2312(4) | 0.2341(4) | 0.2384(5) | 0.2373(4) | 0.2357(5) |
|             | <i>z/c</i>       | 0.90843(8) | 0.4131(2) | 0.4137(2) | 0.4139(2) | 0.4150(2) | 0.4139(2) |
|             | $U_i/U_e^*100$   | 2.89(6)    | 2.2(3)    | 2.3(1)    | 3.4(2)    | 2.6(1)    | 3.4(1)    |
| Ca(3)/RE(3) | <i>x/a</i>       | 0.8416(2)  | 0.1417(5) | 0.1376(4) | 0.1316(4) | 0.1301(4) | 0.1288(4) |
|             | <i>y/b</i>       | 0.2762(2)  | 0.1331(5) | 0.1315(4) | 0.1328(4) | 0.1309(4) | 0.1299(4) |
|             | <i>z/c</i>       | 0.73952(7) | 0.2513(2) | 0.2521(2) | 0.2536(2) | 0.2525(2) | 0.2529(2) |
|             | $U_i/U_e^*100$   | 3.02(6)    | 2.1(3)    | 2.0(1)    | 2.3(1)    | 2.80(8)   | 2.98(9)   |
| Ge(1)       | <i>x/a</i>       | 0.1738(4)  | 0.0977(8) | 0.1010(7) | 0.0999(7) | 0.1301(6) | 0.0997(7) |
|             | <i>y/b</i>       | 0.0650(3)  | 0.3678(7) | 0.3681(6) | 0.3728(7) | 0.3702(6) | 0.3697(7) |
|             | <i>z/c</i>       | 0.9217(1)  | 0.4274(3) | 0.4264(3) | 0.4234(3) | 0.4262(3) | 0.4237(3) |
|             | $U_i/U_e^*100$   | 2.89(9)    | 3.0(3)    | 2.8(1)    | 2.7(2)    | 3.1(1)    | 3.0(1)    |
| Ge(2)       | <i>x/a</i>       | 0.4128(4)  | 0.4463(8) | 0.4426(7) | 0.4473(8) | 0.4499(7) | 0.4470(8) |
|             | <i>y/b</i>       | 0.1787(4)  | 0.2268(6) | 0.2253(5) | 0.2293(7) | 0.2290(6) | 0.2294(7) |
|             | <i>z/c</i>       | 0.5731(1)  | 0.0732(3) | 0.0722(3) | 0.0726(3) | 0.0729(3) | 0.0722(3) |
|             | $U_i/U_e^*100$   | 3.22(9)    | 2.3(3)    | 2.1(1)    | 3.3(2)    | 2.7(1)    | 3.7(2)    |
| Ge(3)       | <i>x/a</i>       | 0.2970(3)  | 0.6603(7) | 0.6589(6) | 0.6569(7) | 0.6582(6) | 0.6537(7) |
|             | <i>y/b</i>       | 0.2751(3)  | 0.1264(7) | 0.1253(6) | 0.1201(7) | 0.1223(6) | 0.1206(7) |
|             | <i>z/c</i>       | 0.7160(1)  | 0.2352(3) | 0.2354(2) | 0.2411(3) | 0.2413(2) | 0.2408(3) |
|             | $U_i/U_e^*100$   | 2.92(7)    | 1.9(3)    | 2.3(1)    | 2.8(1)    | 2.8(1)    | 3.4(1)    |
| O(1)        | <i>x/a</i>       | 0.870(2)   | 0.029(3)  | 0.022(3)  | 0.013(3)  | 0.010(3)  | 0.022(3)  |
|             | <i>y/b</i>       | 0.136(1)   | 0.067(3)  | 0.067(3)  | 0.074(3)  | 0.085(2)  | 0.083(3)  |
|             | <i>z/c</i>       | 0.0335(6)  | 0.125(1)  | 0.123(1)  | 0.133(1)  | 0.124(1)  | 0.131(1)  |
| O(2)        | <i>x/a</i>       | 0.968(2)   | 0.066(3)  | 0.059(3)  | 0.063(3)  | 0.066(3)  | 0.070(3)  |
|             | <i>y/b</i>       | 0.227(1)   | 0.708(3)  | 0.709(3)  | 0.717(3)  | 0.719(3)  | 0.710(3)  |
|             | <i>z/c</i>       | 0.8890(5)  | 0.045(1)  | 0.045(1)  | 0.048(1)  | 0.043(1)  | 0.048(1)  |
| O(3)        | <i>x/a</i>       | 0.140(2)   | 0.150(3)  | 0.154(3)  | 0.159(3)  | 0.145(3)  | 0.157(3)  |
|             | <i>y/b</i>       | 0.445(1)   | 0.457(3)  | 0.463(3)  | 0.464(3)  | 0.450(2)  | 0.452(3)  |
|             | <i>z/c</i>       | 0.7319(6)  | 0.222(1)  | 0.223(1)  | 0.228(1)  | 0.217(1)  | 0.226(1)  |
| O(4)        | <i>x/a</i>       | 0.537(1)   | 0.194(3)  | 0.188(3)  | 0.192(3)  | 0.184(3)  | 0.175(3)  |
|             | <i>y/b</i>       | 0.250(2)   | 0.800(3)  | 0.813(2)  | 0.826(3)  | 0.817(2)  | 0.818(3)  |
|             | <i>z/c</i>       | 0.7787(5)  | 0.288(1)  | 0.279(1)  | 0.265(1)  | 0.2722(9) | 0.266(1)  |
| O(5)        | <i>x/a</i>       | 0.300(2)   | 0.233(3)  | 0.217(3)  | 0.220(3)  | 0.216(3)  | 0.225(3)  |
|             | <i>y/b</i>       | 0.032(2)   | 0.213(3)  | 0.207(3)  | 0.209(3)  | 0.205(2)  | 0.193(3)  |
|             | <i>z/c</i>       | 0.8603(6)  | 0.384(1)  | 0.382(1)  | 0.380(1)  | 0.378(1)  | 0.381(1)  |
| O(6)        | <i>x/a</i>       | 0.380(2)   | 0.304(3)  | 0.302(2)  | 0.299(3)  | 0.312(2)  | 0.303(3)  |
|             | <i>y/b</i>       | 0.307(1)   | 0.062(3)  | 0.054(3)  | 0.061(3)  | 0.047(2)  | 0.051(3)  |
|             | <i>z/c</i>       | 0.4912(5)  | 0.001(1)  | 0.001(1)  | 0.006(1)  | 0.004(1)  | 0.005(1)  |
| O(7)        | <i>x/a</i>       | 0.235(2)   | 0.300(3)  | 0.297(3)  | 0.285(3)  | 0.302(2)  | 0.296(3)  |
|             | <i>y/b</i>       | 0.999(1)   | 0.408(3)  | 0.418(3)  | 0.433(3)  | 0.422(2)  | 0.431(3)  |
|             | <i>z/c</i>       | 0.5459(6)  | 0.090(1)  | 0.086(1)  | 0.079(1)  | 0.0841(9) | 0.084(1)  |
| O(8)        | <i>x/a</i>       | 0.132(2)   | 0.485(3)  | 0.495(3)  | 0.486(4)  | 0.485(3)  | 0.479(3)  |
|             | <i>y/b</i>       | 0.081(1)   | 0.175(3)  | 0.184(2)  | 0.178(3)  | 0.166(2)  | 0.165(3)  |
|             | <i>z/c</i>       | 0.6970(6)  | 0.280(1)  | 0.279(1)  | 0.278(1)  | 0.287(1)  | 0.280(1)  |
| O(9)        | <i>x/a</i>       | 0.667(1)   | 0.502(3)  | 0.520(3)  | 0.534(3)  | 0.527(3)  | 0.531(3)  |
|             | <i>y/b</i>       | 0.663(2)   | 0.063(3)  | 0.067(3)  | 0.063(3)  | 0.054(2)  | 0.054(3)  |
|             | <i>z/c</i>       | 0.3695(6)  | 0.141(1)  | 0.144(1)  | 0.144(1)  | 0.150(1)  | 0.149(1)  |
| O(10)       | <i>x/a</i>       | 0.663(2)   | 0.616(3)  | 0.626(3)  | 0.639(3)  | 0.626(3)  | 0.636(3)  |
|             | <i>y/b</i>       | 0.101(2)   | 0.307(3)  | 0.325(2)  | 0.327(3)  | 0.313(3)  | 0.312(3)  |
|             | <i>z/c</i>       | 0.6173(6)  | 0.041(1)  | 0.043(1)  | 0.040(1)  | 0.040(1)  | 0.036(1)  |
|             | $U_i/U_e^*100^a$ | 2.8(1)     | 1.9(3)    | 2.2(2)    | 1.8(2)    | 1.8(2)    | 1.7(2)    |

<sup>a</sup> The thermal vibration parameters of oxygen atoms have been constrained as a single variable.



**Table S2** Atomic coordinates and thermal parameters ( $\text{\AA}^2$ ) for  $\text{CaRE}_2\text{Ge}_3\text{O}_{10}$  ( $RE = \text{Y, Dy-Yb}$ )

| Atom        |                  | Dy        | Y          | Ho         | Er          | Tm         | Yb         |
|-------------|------------------|-----------|------------|------------|-------------|------------|------------|
| Ca(1)/RE(1) | <i>x/a</i>       | 0.0267(5) | 0.0249(3)  | 0.0259(3)  | 0.02453(20) | 0.0238(2)  | 0.0229(2)  |
|             | <i>y/b</i>       | 0.9008(4) | 0.9009(3)  | 0.9003(2)  | 0.90048(18) | 0.8997(2)  | 0.8988(2)  |
|             | <i>z/c</i>       | 0.4152(2) | 0.4149(1)  | 0.4151(1)  | 0.41485(7)  | 0.41479(9) | 0.41475(7) |
|             | $U_i/U_e^*100$   | 2.9(1)    | 2.2(1)     | 2.58(6)    | 2.485(45)   | 2.58(6)    | 2.48(5)    |
| Ca(2)/RE(2) | <i>x/a</i>       | 0.5801(5) | 0.5821(3)  | 0.5815(3)  | 0.58133(21) | 0.5813(3)  | 0.5797(2)  |
|             | <i>y/b</i>       | 0.2353(4) | 0.2343(3)  | 0.2349(2)  | 0.23391(19) | 0.2323(2)  | 0.2295(2)  |
|             | <i>z/c</i>       | 0.4140(2) | 0.4148(1)  | 0.4148(1)  | 0.41467(8)  | 0.4144(1)  | 0.41421(8) |
|             | $U_i/U_e^*100$   | 2.8(1)    | 2.0(1)     | 2.30(6)    | 2.215(49)   | 2.20(7)    | 2.30(6)    |
| Ca(3)/RE(3) | <i>x/a</i>       | 0.1280(3) | 0.1292(2)  | 0.1291(2)  | 0.12881(14) | 0.1283(2)  | 0.1281(1)  |
|             | <i>y/b</i>       | 0.1296(4) | 0.1290(2)  | 0.1290(2)  | 0.12831(13) | 0.1274(2)  | 0.1258(1)  |
|             | <i>z/c</i>       | 0.2532(2) | 0.25331(9) | 0.25332(8) | 0.25352(6)  | 0.25337(7) | 0.25340(6) |
|             | $U_i/U_e^*100$   | 2.37(8)   | 1.79(9)    | 2.02(4)    | 2.023(28)   | 1.99(4)    | 1.99(3)    |
| Ge(1)       | <i>x/a</i>       | 0.0980(6) | 0.0971(3)  | 0.0975(3)  | 0.09699(26) | 0.0961(3)  | 0.0958(3)  |
|             | <i>y/b</i>       | 0.3715(6) | 0.3718(3)  | 0.3716(3)  | 0.37084(24) | 0.3710(3)  | 0.3697(3)  |
|             | <i>z/c</i>       | 0.4241(3) | 0.4243(1)  | 0.4243(1)  | 0.42393(10) | 0.4234(1)  | 0.4231(1)  |
|             | $U_i/U_e^*100$   | 2.6(1)    | 2.39(9)    | 2.15(5)    | 2.29(5)     | 2.28(6)    | 2.22(5)    |
| Ge(2)       | <i>x/a</i>       | 0.4479(7) | 0.4520(3)  | 0.4523(3)  | 0.45326(26) | 0.4539(3)  | 0.4542(3)  |
|             | <i>y/b</i>       | 0.2287(6) | 0.2279(3)  | 0.2266(3)  | 0.22628(23) | 0.2262(3)  | 0.2251(3)  |
|             | <i>z/c</i>       | 0.0719(2) | 0.0720(1)  | 0.0722(1)  | 0.07203(10) | 0.0718(1)  | 0.0716(1)  |
|             | $U_i/U_e^*100$   | 2.6(1)    | 2.2(1)     | 1.95(5)    | 2.08(5)     | 2.00(6)    | 2.06(5)    |
| Ge(3)       | <i>x/a</i>       | 0.6543(6) | 0.6560(3)  | 0.6561(3)  | 0.65645(25) | 0.6556(3)  | 0.6555(3)  |
|             | <i>y/b</i>       | 0.1174(6) | 0.1170(3)  | 0.1175(3)  | 0.11641(25) | 0.1149(3)  | 0.1132(3)  |
|             | <i>z/c</i>       | 0.2412(2) | 0.2411(1)  | 0.2413(1)  | 0.24133(9)  | 0.2408(1)  | 0.2408(1)  |
|             | $U_i/U_e^*100$   | 2.5(1)    | 1.95(9)    | 1.70(5)    | 1.92(4)     | 1.90(6)    | 1.86(5)    |
| O(1)        | <i>x/a</i>       | 0.017(3)  | 0.016(1)   | 0.016(1)   | 0.0148(12)  | 0.014(2)   | 0.017(1)   |
|             | <i>y/b</i>       | 0.076(2)  | 0.075(1)   | 0.079(1)   | 0.0768(11)  | 0.076(1)   | 0.077(1)   |
|             | <i>z/c</i>       | 0.130(1)  | 0.1289(5)  | 0.1269(5)  | 0.1275(5)   | 0.1280(6)  | 0.1293(5)  |
| O(2)        | <i>x/a</i>       | 0.072(3)  | 0.068(1)   | 0.065(1)   | 0.0635(12)  | 0.066(2)   | 0.066(1)   |
|             | <i>y/b</i>       | 0.711(2)  | 0.719(1)   | 0.715(1)   | 0.7162(11)  | 0.717(1)   | 0.714(1)   |
|             | <i>z/c</i>       | 0.0505(9) | 0.0459(4)  | 0.0488(5)  | 0.0467(5)   | 0.0485(6)  | 0.0470(5)  |
| O(3)        | <i>x/a</i>       | 0.160(3)  | 0.147(1)   | 0.148(1)   | 0.1462(12)  | 0.147(2)   | 0.147(1)   |
|             | <i>y/b</i>       | 0.448(2)  | 0.450(1)   | 0.449(1)   | 0.4494(10)  | 0.446(1)   | 0.445(1)   |
|             | <i>z/c</i>       | 0.227(1)  | 0.2171(4)  | 0.2199(5)  | 0.2176(4)   | 0.2188(6)  | 0.2195(5)  |
| O(4)        | <i>x/a</i>       | 0.180(2)  | 0.184(1)   | 0.1864(12) | 0.1876(11)  | 0.187(2)   | 0.188(1)   |
|             | <i>y/b</i>       | 0.812(2)  | 0.813(1)   | 0.815(1)   | 0.8109(11)  | 0.808(1)   | 0.808(1)   |
|             | <i>z/c</i>       | 0.2642(9) | 0.2677(4)  | 0.2663(5)  | 0.2660(4)   | 0.2665(6)  | 0.2665(5)  |
| O(5)        | <i>x/a</i>       | 0.218(3)  | 0.217(1)   | 0.220(1)   | 0.2177(13)  | 0.215(2)   | 0.216(1)   |
|             | <i>y/b</i>       | 0.198(2)  | 0.202(1)   | 0.201(1)   | 0.2001(11)  | 0.197(1)   | 0.195(1)   |
|             | <i>z/c</i>       | 0.380(1)  | 0.3795(5)  | 0.3815(5)  | 0.3807(5)   | 0.3787(6)  | 0.3787(5)  |
| O(6)        | <i>x/a</i>       | 0.307(2)  | 0.308(1)   | 0.309(1)   | 0.3088(11)  | 0.309(2)   | 0.304(1)   |
|             | <i>y/b</i>       | 0.055(2)  | 0.053(1)   | 0.055(1)   | 0.0570(11)  | 0.058(1)   | 0.057(1)   |
|             | <i>z/c</i>       | 0.004(1)  | 0.0059(5)  | 0.0056(6)  | 0.0056(5)   | 0.0045(6)  | 0.0039(5)  |
| O(7)        | <i>x/a</i>       | 0.299(2)  | 0.308(1)   | 0.303(1)   | 0.3040(11)  | 0.303(1)   | 0.302(1)   |
|             | <i>y/b</i>       | 0.425(2)  | 0.419(1)   | 0.420(1)   | 0.4175(11)  | 0.416(1)   | 0.411(1)   |
|             | <i>z/c</i>       | 0.0838(8) | 0.0876(4)  | 0.0864(4)  | 0.0862(4)   | 0.0870(5)  | 0.0870(4)  |
| O(8)        | <i>x/a</i>       | 0.480(3)  | 0.473(1)   | 0.478(1)   | 0.4772(12)  | 0.478(2)   | 0.474(1)   |
|             | <i>y/b</i>       | 0.158(2)  | 0.168(1)   | 0.165(1)   | 0.1651(10)  | 0.162(1)   | 0.161(1)   |
|             | <i>z/c</i>       | 0.282(1)  | 0.2843(5)  | 0.2848(5)  | 0.2843(4)   | 0.2845(6)  | 0.2841(5)  |
| O(9)        | <i>x/a</i>       | 0.532(3)  | 0.525(1)   | 0.529(1)   | 0.5272(12)  | 0.529(2)   | 0.529(1)   |
|             | <i>y/b</i>       | 0.059(2)  | 0.048(1)   | 0.052(1)   | 0.0484(11)  | 0.048(1)   | 0.045(1)   |
|             | <i>z/c</i>       | 0.147(1)  | 0.1458(5)  | 0.1476(6)  | 0.1460(5)   | 0.1451(6)  | 0.1452(5)  |
| O(10)       | <i>x/a</i>       | 0.632(2)  | 0.636(1)   | 0.638(1)   | 0.6371(11)  | 0.634(2)   | 0.636(1)   |
|             | <i>y/b</i>       | 0.317(3)  | 0.320(1)   | 0.324(1)   | 0.3236(11)  | 0.322(1)   | 0.322(1)   |
|             | <i>z/c</i>       | 0.036(1)  | 0.0387(5)  | 0.0380(5)  | 0.0387(5)   | 0.0375(6)  | 0.0389(5)  |
|             | $U_i/U_e^*100^a$ | 1.8(2)    | 1.7(1)     | 1.63(8)    |             | 1.8(1)     | 1.73(8)    |

<sup>a</sup> The thermal vibration parameters of oxygen atoms have been constrained as a single variable.

**Table S3** The  $\text{Ca}^{2+}$ - $\text{RE}^{3+}$  fractions in three metal cation sites in the structures of  $\text{CaRE}_2\text{Ge}_3\text{O}_{10}$  ( $\text{RE} = \text{La-Tb}$ )

| Atom  | La       | Pr       | Nd       | Eu       | Gd       | Tb       |
|-------|----------|----------|----------|----------|----------|----------|
| Ca(1) | 0.928(0) | 0.227(2) | 0.276(4) | 0.395(5) | 0.404(4) | 0.390(5) |
| RE(1) | 0.072(0) | 0.773(2) | 0.724(4) | 0.605(5) | 0.596(4) | 0.610(5) |
| Ca(2) | 0.073(3) | 0.427(3) | 0.424(1) | 0.418(5) | 0.473(3) | 0.453(4) |
| RE(2) | 0.927(3) | 0.573(3) | 0.576(1) | 0.582(5) | 0.527(3) | 0.547(4) |
| Ca(3) | 0.000(3) | 0.346(5) | 0.300(5) | 0.187(1) | 0.123(1) | 0.157(1) |
| RE(3) | 1.000(3) | 0.654(5) | 0.700(5) | 0.813(1) | 0.877(1) | 0.843(1) |

**Table S4** The  $\text{Ca}^{2+}$ - $\text{RE}^{3+}$  fractions in three metal cation sites in the structures of  $\text{CaRE}_2\text{Ge}_3\text{O}_{10}$  ( $\text{RE} = \text{Y, Dy-Yb}$ )

| Atom  | Dy       | Y        | Y <sup>a</sup> | Ho       | Er       | Tm       | Yb       |
|-------|----------|----------|----------------|----------|----------|----------|----------|
| Ca(1) | 0.399(4) | 0.447(4) | 0.450(3)       | 0.415(3) | 0.421(2) | 0.418(2) | 0.416(2) |
| RE(1) | 0.601(4) | 0.553(4) | 0.550(3)       | 0.585(3) | 0.579(2) | 0.582(2) | 0.584(2) |
| Ca(2) | 0.476(3) | 0.464(4) | 0.462(4)       | 0.481(2) | 0.499(2) | 0.518(2) | 0.524(2) |
| RE(2) | 0.524(3) | 0.536(4) | 0.538(3)       | 0.519(2) | 0.501(2) | 0.482(2) | 0.476(2) |
| Ca(3) | 0.125(1) | 0.089(1) | 0.088(4)       | 0.104(1) | 0.080(2) | 0.064(2) | 0.060(1) |
| RE(3) | 0.875(1) | 0.911(1) | 0.912(3)       | 0.896(1) | 0.920(2) | 0.936(2) | 0.940(1) |

<sup>a</sup> Data for the  $\text{CaY}_2\text{Ge}_3\text{O}_{10}$  compound taken from Ref. [1].

## References

- 1 H. Yamane, R. Tanimura, T. Yamada, J. Takahashi, T. Kajiwarra and M. Shimada, *J. Solid State Chem.*, 2006, **179**, 289–295.
